# Supplementary material for: Developing intelligent medical image modality classification system using deep transfer learning and LDA
Source: PubMed Central journal article supplement (PMC7393510; doi:10.1038/s41598-020-69813-2), 2020-07-30
Supplement: 41598_2020_69813_MOESM1_ESM.pdf [file 41598_2020_69813_MOESM1_ESM.pdf]

# **Developing intelligent medical image modality classification system using deep transfer learning and LDA**

Mehdi Hassan<sup>1\*</sup>, Safdar Ali<sup>2</sup>, Hani Alquhayz<sup>3</sup>, Khushbakht Safdar<sup>4</sup>

<sup>1</sup>Department of Computer Science, Air University, PAF Complex Sector E-9, Islamabad Pakistan

<sup>2</sup>Directorate General National Repository, Islamabad Pakistan

<sup>3</sup>Department of Computer Science and Information, College of Science in Zulfi, Majmaah University, Al-Majmaah, 11952, Saudi Arabia

<sup>4</sup>Al Nafees Medical College and Teaching Hospital, ISRA University, Lehtrar Road, Islamabad Pakistan

**\*Corresponding Author:**

Mehdi Hassan

Tel: +92-51-9263335-7, Fax: +92-51-9260158

[mehdi.hassan@mail.au.edu.pk](mailto:mehdi.hassan@mail.au.edu.pk) , [mehdi.hassan5@gmail.com](mailto:mehdi.hassan5@gmail.com)

# Supplementary Material

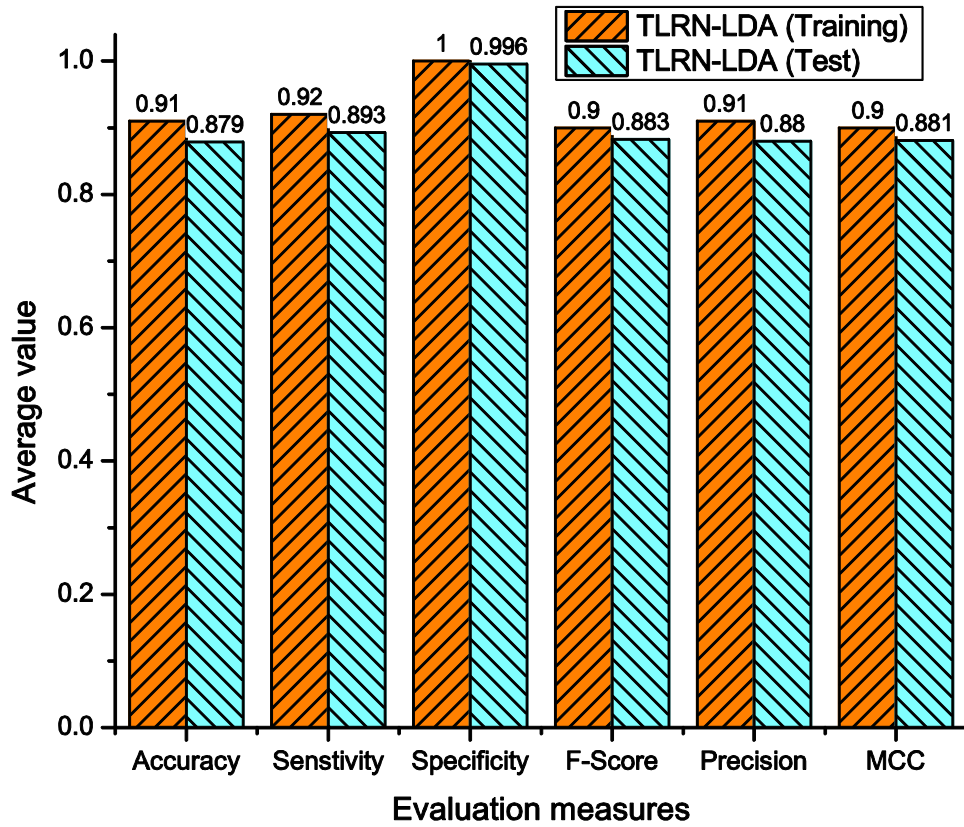

Figure S1: Training and testing performance comparison of the TLRN-LDA model.

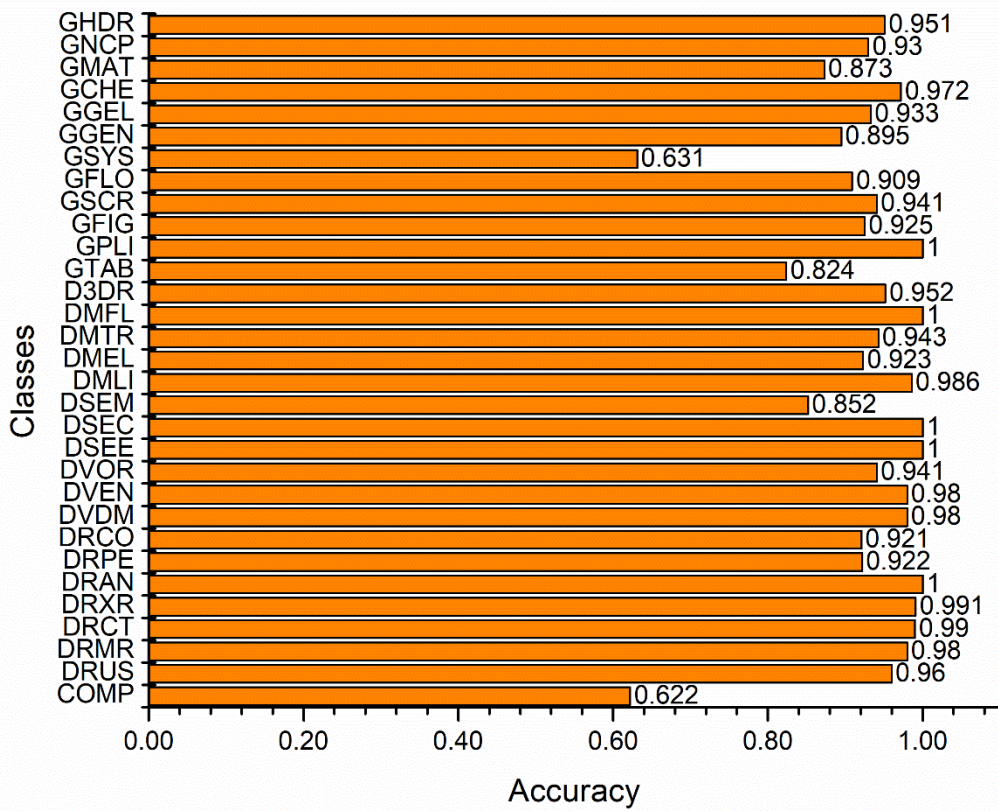

Figure S2: Class-wise training accuracy of TLRN-LDA

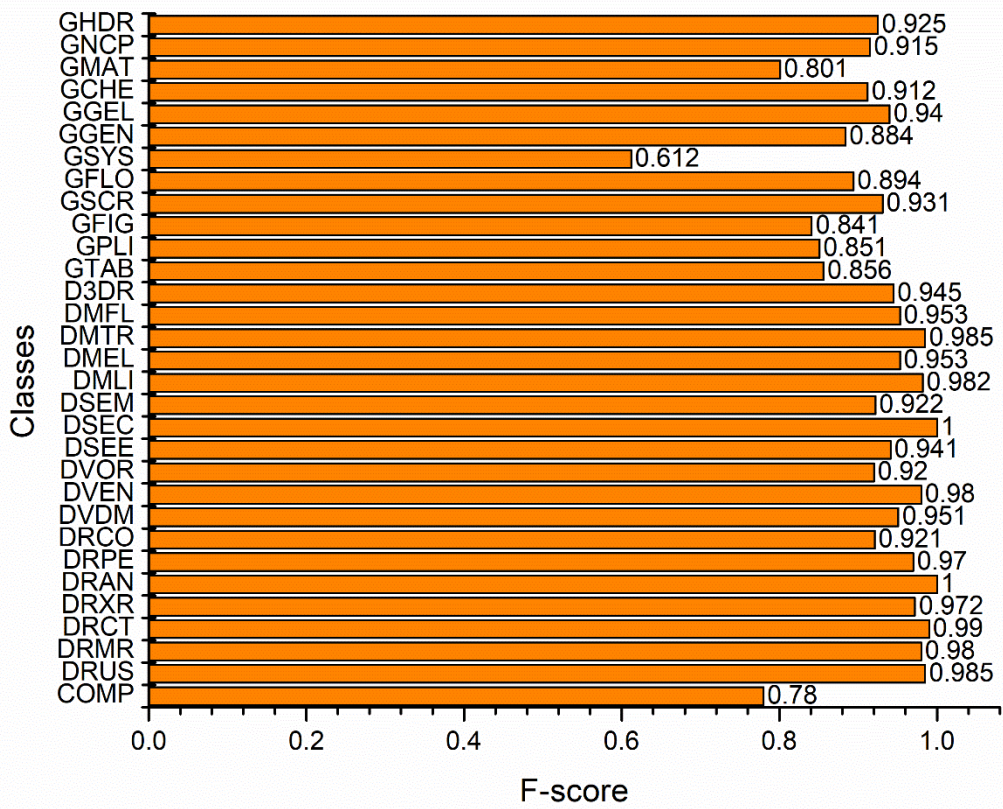

Figure S3: Class-wise training F-score measure of TLRN-LDA

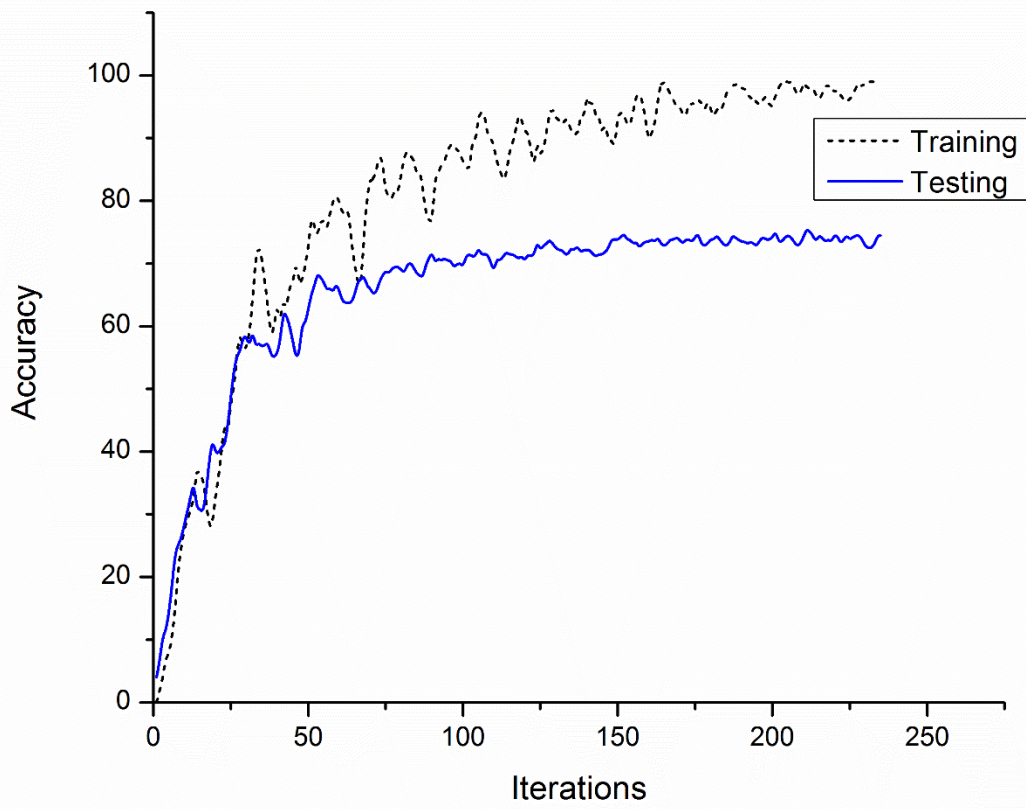

Figure S4: Training and testing accuracy of TL-ResNet50 at different iterations

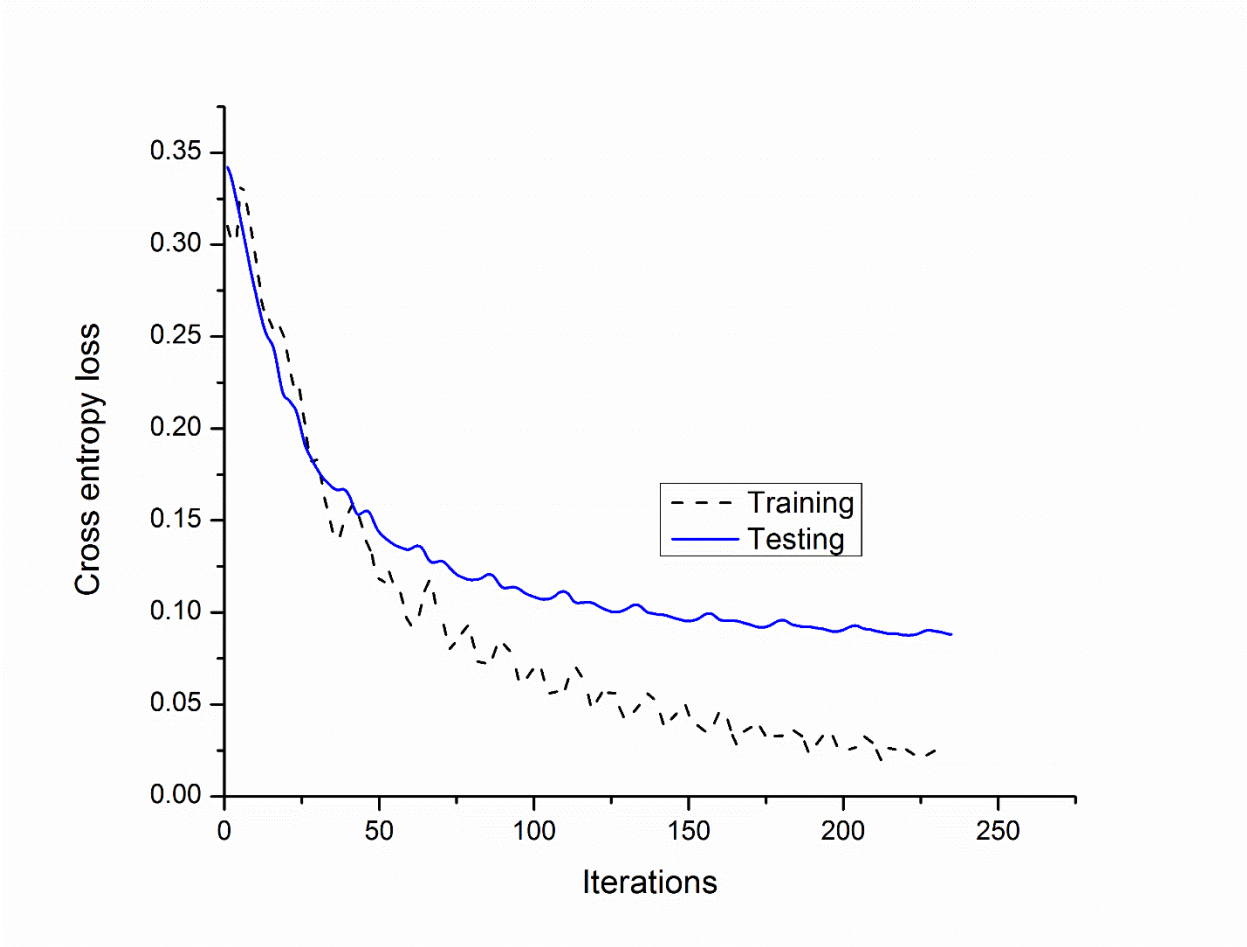

Figure S5: Training and testing loss of TL-ResNet50 at different iterations
